# Supplementary material for: Synthesis of a unique cross-linked polyzwitterion/anion with an aspartic acid residue and its use for Pb2+ removal from aqueous solution
Source: Royal Society of Chemistry journal article supplement (doi:10.1039/c5ra05447h), 2015-01-01

## Synthesis of a unique cross-linked polyzwitterion/anion having aspartic acid residue and its use for Pb<sup>2+</sup> removal from aqueous solution

Zakariyah A. Jamiu, Tawfik A. Saleh, Shaikh A. Ali

Department of Chemistry, King Fahd University of Petroleum & Minerals, Dhahran, Saudi Arabia

### S1. Calculations based on monomer feed ratios

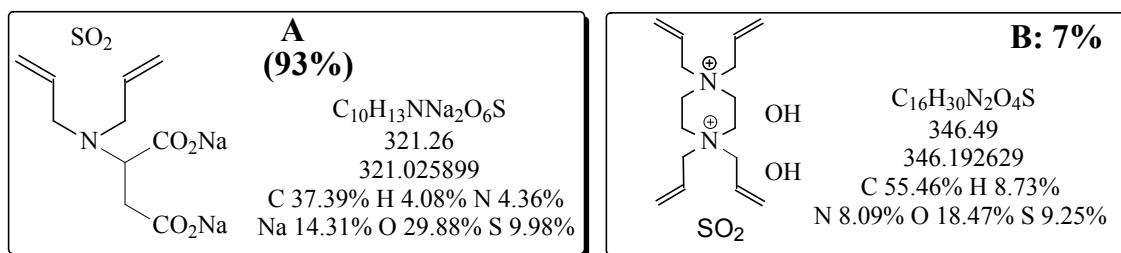

The two repeat units **A** and **B** above have their respective calculated elemental analysis given in the box.

Now, for 93% **A** and 7% **B**, the calculated value for instance of C =  $37.39 \times 0.93 + 55.46 \times 0.07 = 38.65$ . Note that 37.39 is the value of C for 100% **A**, while 55.46 is the value of C for 100% **B**. 0.93 and 0.07 are the corresponding factor for 93% and 7%, respectively. So:

$$C = 37.39 \times 0.93 + 55.46 \times 0.07 = 38.65.$$

$$H = 4.08 \times 0.93 + 8.73 \times 0.07 = 4.41.$$

$$N = 4.36 \times 0.93 + 8.09 \times 0.07 = 4.62.$$

$$S = 9.98 \times 0.93 + 9.25 \times 0.07 = 9.93.$$

It is an approximate set of values since; there may be a maximum of **2 SO<sub>2</sub>** units as in **C**, in which case the calculation will be slightly different to obtain:

C, 38.05; H, 4.31; N, 4.53; S, 10.37%.

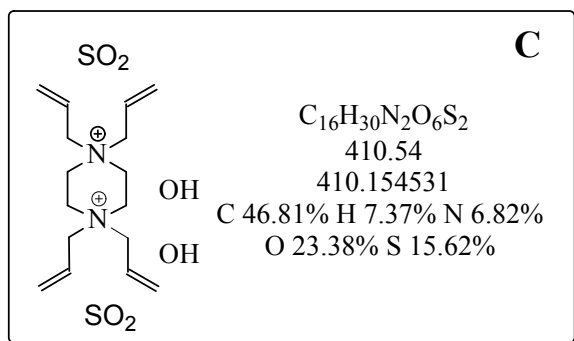

Supplement: c5ra05447h1.pdf [file c5ra05447h1.pdf]
